# Supplementary material for: Spatial immunophenotypes predict response to anti-PD1 treatment and capture distinct paths of T cell evasion in triple negative breast cancer
Source: PubMed Central journal article supplement (PMC8476574; doi:10.1038/s41467-021-25962-0), 2021-09-27
Supplement: 41467_2021_25962_MOESM1_ESM.pdf [file 41467_2021_25962_MOESM1_ESM.pdf]

## Supplementary Tables and Figures

| Cohorts                                          | Cohort A                                                                                                                                                                                                                                                | Cohort B                                                      | Cohort C                                 | Cohort D                                                                                                                              | Cohort E                                                                                                                                                                     | Cohort F                                        |
|--------------------------------------------------|---------------------------------------------------------------------------------------------------------------------------------------------------------------------------------------------------------------------------------------------------------|---------------------------------------------------------------|------------------------------------------|---------------------------------------------------------------------------------------------------------------------------------------|------------------------------------------------------------------------------------------------------------------------------------------------------------------------------|-------------------------------------------------|
| <b>Tumor types and number of patients</b>        | n=228 TNBC                                                                                                                                                                                                                                              | n=867 BC of which n=196 basal-like                            | n=347 BC of which n=66 TNBC              | n=53 TNBC from phase II clinical trial (n=44 paired samples from metastatic lesions pre- and post-induction treatment)                | n=1284 BRCA of which n=137 TNBC; n=477 SKCM; n=454 BLCA; n=877 LUAD; n=623 PRAD; n=567 HNSC; n=91 KICH; n=309 CESC; n=183 PAAD; n=329 COAD; n=81 ICI treated metastatic SKCM | n=12 TN lymph node macro-metastases             |
| <b>Disease stage*</b>                            | primary                                                                                                                                                                                                                                                 | primary                                                       | primary                                  | metastatic                                                                                                                            | primary                                                                                                                                                                      | metastatic                                      |
| <b>Treatment*</b>                                | none                                                                                                                                                                                                                                                    | none                                                          | none                                     | anti-PD1 preceded by 2-weeks cisplatin (n=9); cyclophosphamide (n=12); doxorubicin (n=11); irradiation (n=10); or no induction (n=11) | variable                                                                                                                                                                     | variable                                        |
| <b>Age (mean)*</b>                               | 52                                                                                                                                                                                                                                                      | 53                                                            | 54                                       | 51                                                                                                                                    | 58                                                                                                                                                                           | NA                                              |
| <b>Tumor size*</b>                               | 33% T1; 47% T2; 4% T3; 1% T4; 15% NA                                                                                                                                                                                                                    | 39% T1; 60% T2; 0.5% T3; 0.5% T4                              | 24% T1; 37% T2; 5% T3; 4% T4; 30% NA     | NA                                                                                                                                    | NA                                                                                                                                                                           | NA                                              |
| <b>Nodal status*</b>                             | 70% LN0; 16% LN+; 14% NA                                                                                                                                                                                                                                | 100% LN0                                                      | 45% LN0; 24% LN+; 31% NA                 | all M1                                                                                                                                | 65% LN0; 35% LN+                                                                                                                                                             | 100% LN+                                        |
| <b>Datasets</b>                                  | prognosis discovery: n=122 (LNN with clinical records >10 year follow up); gene classifier discovery: n=101 (microarray); classifier validation: n=43 primary, immune effector panel: n=64; spatial phenotype panel: n=69; IHC (multiple markers): n=30 | prognosis validation: n=786 (microarray and clinical records) | genomic features: n=347 (WGS and RNAseq) | predictor: n=53 (RNAseq, PD-L1 staining, clinical records)                                                                            | prognosis/prediction (RNAseq, clinical records, anti-PD1 response)                                                                                                           | Validation of gene-classifier: RNAseq from FFPE |
| <b>Determination of spatial immunophenotypes</b> | CD8 stainings                                                                                                                                                                                                                                           | gene-classifier                                               | gene-classifier                          | gene-classifier                                                                                                                       | gene-classifier                                                                                                                                                              | CD8 stainings                                   |
| <b>Access</b>                                    | GSE177043, Supplementary file 2                                                                                                                                                                                                                         | GSE2034, GSE5327, GSE11121, GSE2990, GSE7390                  | EGAS00001001178                          | EGAS00001003535                                                                                                                       | <a href="https://xenabrowser.net/">https://xenabrowser.net/</a> , GSE7822036, GSE9106135                                                                                     | Supplementary file 3                            |

**Supplementary Table 1. Overview of study cohorts.** Clinical features and access of the different cohorts. \*characteristics for TNBC patients. Abbreviations: LN0: lymph-node negative; LN+: lymph-node positive; NA: not available; BRCA: breast cancer; BLCA: bladder cancer; SKCM: skin-cutaneous melanoma; LUAD: lung adenocarcinoma; HNSC: head and neck squamous-cell carcinoma; PRAD: prostate adenocarcinoma; PAAD: pancreatic adenocarcinoma; COAD: colorectal adenocarcinoma; CESC: cervical squamous cell carcinoma and endocervical adenocarcinoma; KICH: chromophobe renal cell carcinoma.

| <b>a</b> | <b>Covariate</b>                      | <b>HR (CI)</b>   | <b>p-value</b> |
|----------|---------------------------------------|------------------|----------------|
|          | inflamed immunophenotype based on IHC | 0.31 (0.13-0.75) | 0.009          |
|          | tumor size                            | 1.01 (0.98-1.05) | 0.19           |
|          | grade                                 | 0.89 (0.49-1.6)  | 0.69           |
|          | age                                   | 0.98 (0.95-1.01) | 0.13           |
|          | TLS presence                          | 0.64 (0.29-1.5)  | 0.28           |
|          | TLS frequency                         | 1.00 (0.78-1.17) | 0.13           |

| <b>b</b> | <b>Covariate</b>                                  | <b>HR (CI)</b>   | <b>p-value</b> |
|----------|---------------------------------------------------|------------------|----------------|
|          | inflamed immunophenotype based on gene expression | 0.17 (0.05-0.58) | 0.004          |
|          | nodal status                                      | 6.83 (0.85-54.8) | 0.07           |
|          | tumor size                                        | 1.17 (0.4-3.39)  | 0.76           |
|          | age                                               | 1.02 (0.98-1.05) | 0.23           |
|          | TLS signature (Carbrita, Nature, 2020)            | 1.3 (0.7-2.5)    | 0.38           |

**Supplementary Table 2. Multivariable Cox regression analysis including spatial immunophenotypes. a.** Multivariable Cox regression analysis including spatial immunophenotypes based on IHC (Cohort A, n=106). **b.** Multivariable Cox regression analysis including spatial immunophenotypes based on gene-expression (Cohort E, n=140). P-values correspond to cox-proportional hazard model. All spatial immunophenotypes were part of analysis, but outcomes are displayed for inflamed immunophenotype. Abbreviations: TLS: tertiary lymphoid structures, HR: hazard ratio, CI: confidence interval.

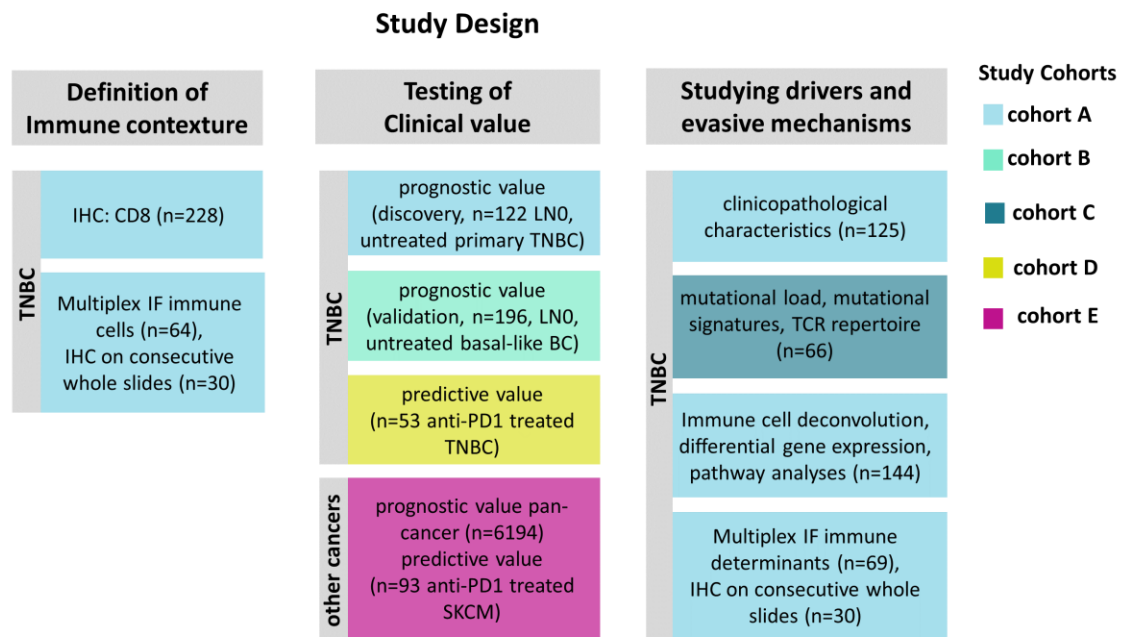

**Supplementary Fig. 1 Study Design.** Different steps and types of analyses regarding spatial immunophenotypes. Colors of boxes reflect the cohorts used for each step (for details and clinical characteristics of cohorts see M&M section and **Supplementary Table 1**). For cohort A spatial phenotypes were identified using IHC of CD8+ T-cells on whole slides and for cohort B-E spatial phenotypes were assigned using the gene-classifier

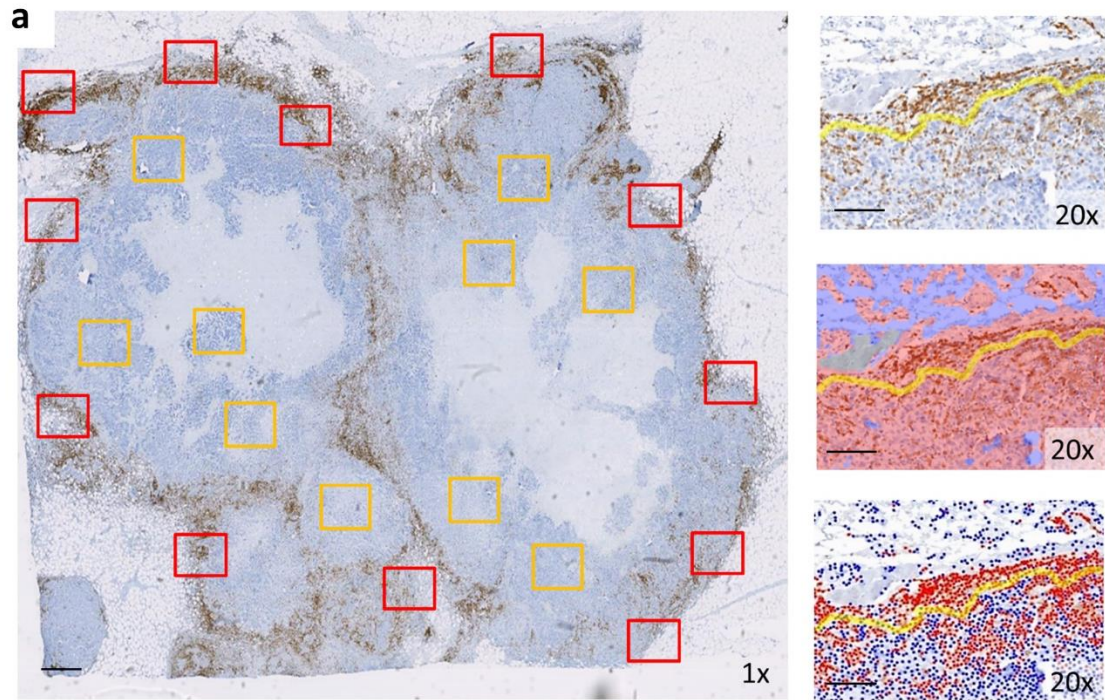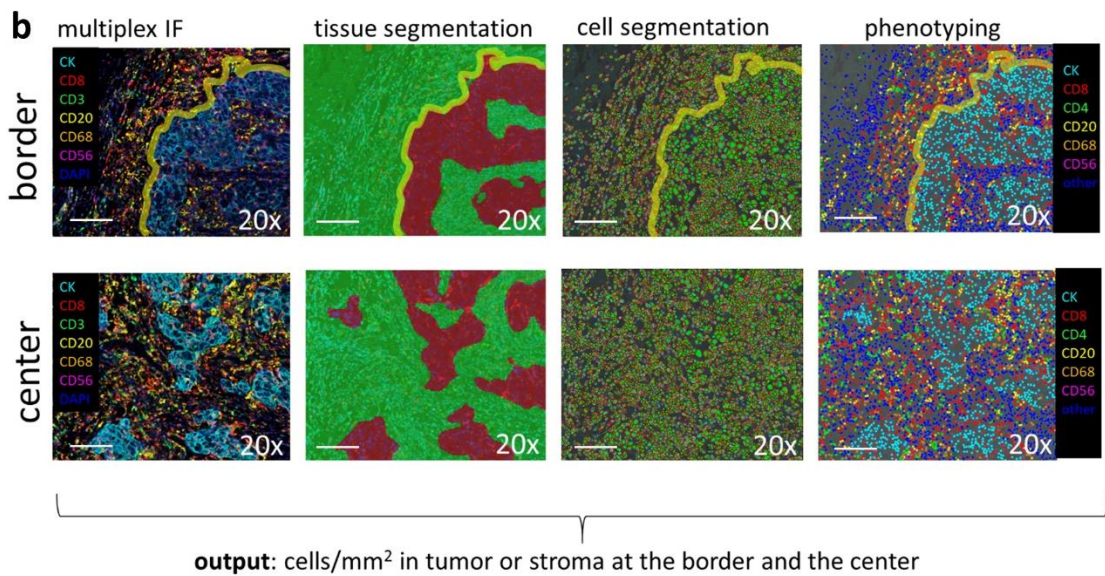

**Supplementary Fig. 2. Workflow for digital image analysis of immune stainings.** **a.** Whole slide images of CD8+ T-cell IHC with border and center stamps (regions of interest, red and yellow, respectively) with close-up (20x magnification, scalebar represents 100 $\mu$ m) of one border stamp (top), separation of tissue (red) and empty space (blue) (middle) and identification of CD8-positive (red) and negative (blue) cells (bottom). Yellow line indicates outer tumor margin. **b.** Image analysis for multiplex IF of immune effector cell panel at border and center of an inflamed TNBC; from left to right: multicolour IF image, tissue segmentation (red: tumor; green: stroma; orange: empty space, yellow line: outer tumor margin); cell segmentation; and individually phenotyped cells (Inform software). Scalebar represents 100 $\mu$ m. Stamp size: 670x502  $\mu$ m<sup>2</sup>; resolution: 2 pixels/ $\mu$ m<sup>2</sup>; pixel size: 0.5x0.5  $\mu$ m<sup>2</sup>.

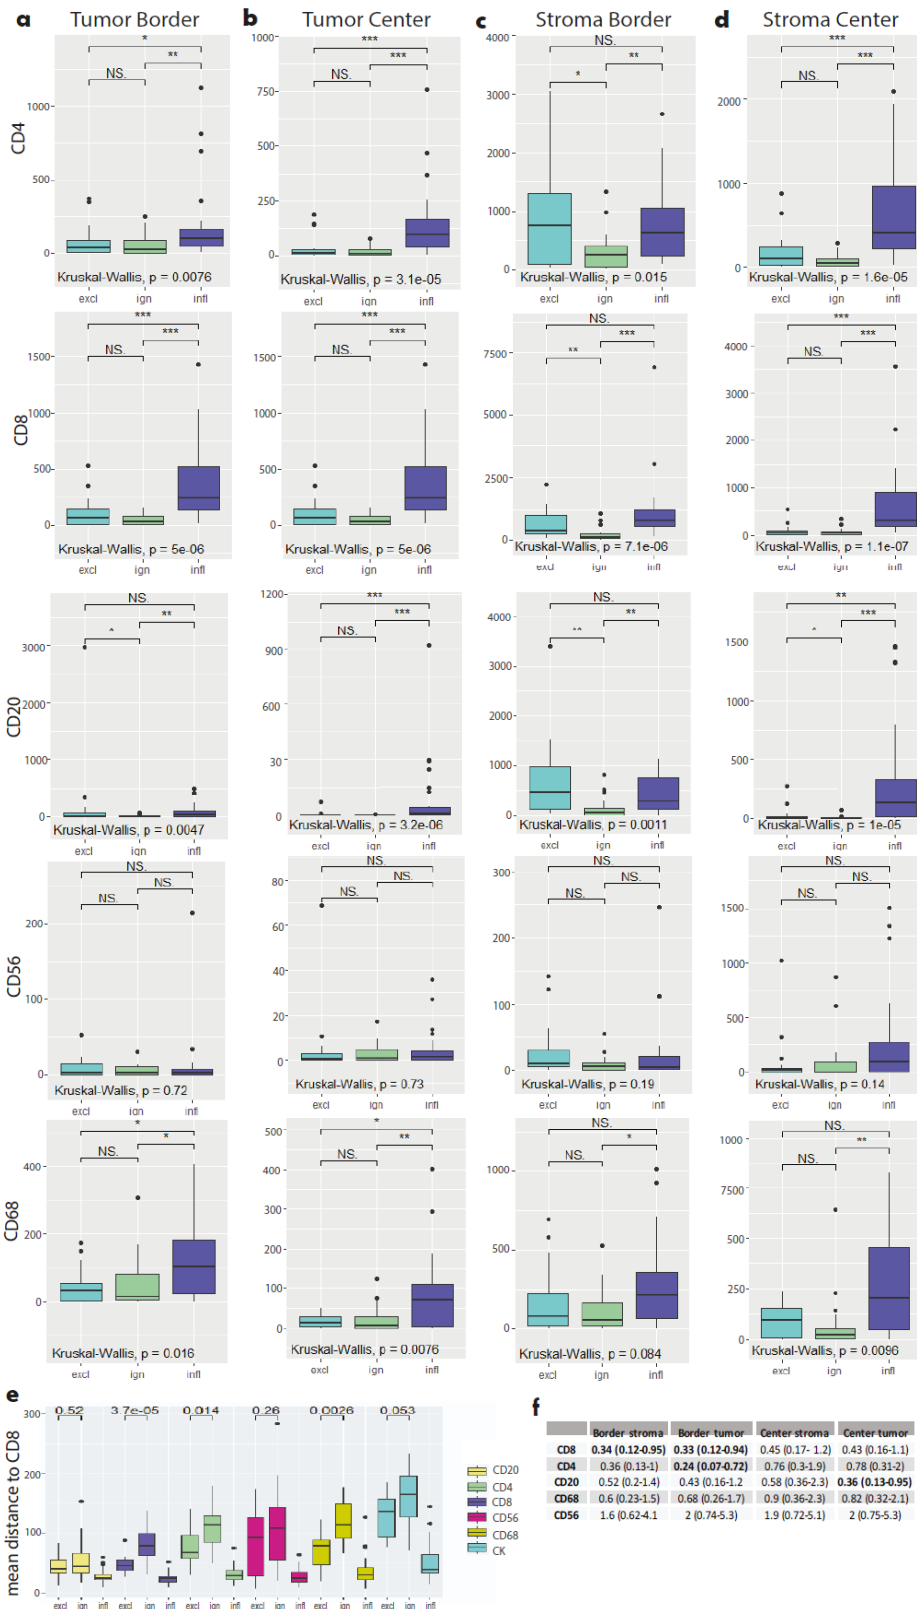

**Supplementary Fig. 3. Immune effector cells according to spatial phenotypes in TNBC.** Boxplots show median with 25th-75th percentile and range (outliers are displayed as dots) for cell densities (in cell number/mm<sup>2</sup>) following staining and analysis using immune effector panel. **a.** Tumor border. **b.** Tumor center. **c.** Stroma border. **d.** Stroma Center. **e.** Boxplots show median with 25th-75th percentile and range (outliers are displayed as dots) for distances between CD8+ T-cells and other cell types. **f.** Table with Hazard Ratios (HR) and 95% confidence intervals (CI, between brackets) for MFS of immune cell densities (significant HR values are shown in bold, analyses not corrected for multiple testing). Cohort A was used for panels **a-f**,  $n=64$  LNN TNBC of which  $n=18$  with

excluded-, n=19 with ignored- and n=27 with inflamed phenotype). Significant differences are: \*\*\*, p<0.001; \*\*, p<0.01; \*, p<0.05; NS, p>0.5 (Kruskal-Wallis, one-sided). Source data are provided within source data file.

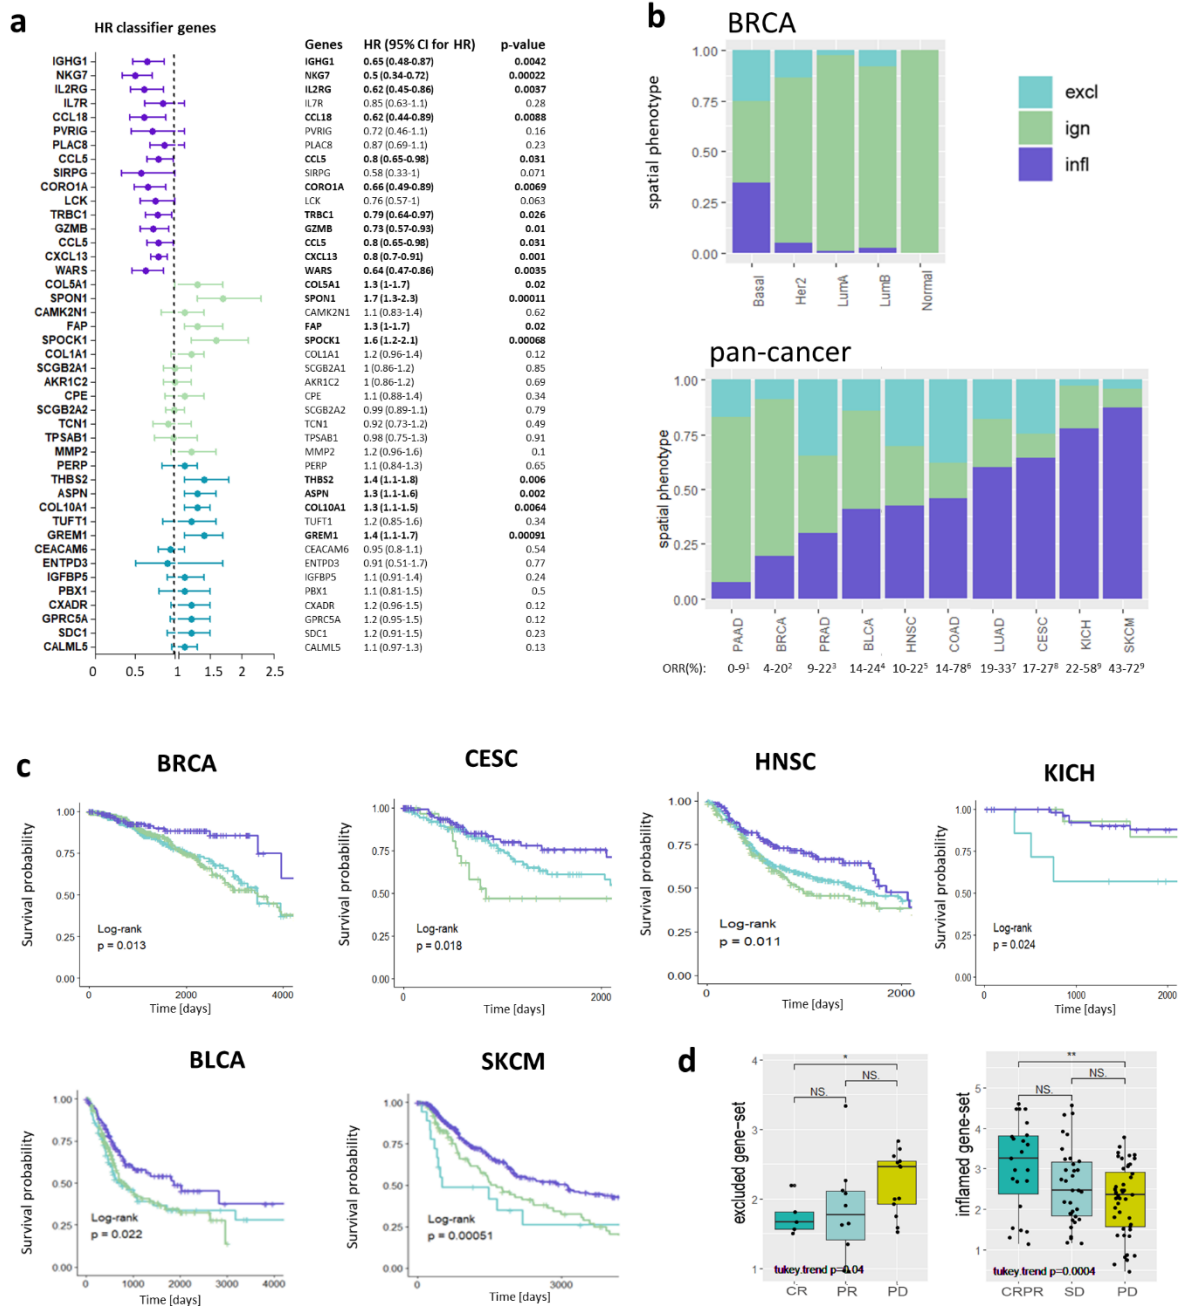

**Supplementary Fig. 4. Spatial phenotypes in non-TNBC cancers.** **a.** Forestplots showing HRs and CIs (error bars) of individual classifier genes (Cohort B, not corrected for multiple testing, n=196 basal-like BC). **b.** Stacked bar-graphs show frequencies of spatial phenotypes in different breast cancer subtypes (left, Cohort B, n= 867 BC) and various cancer types (right, Cohort E, n=5194, see Table S1 for details); below right panel objective response rates (ORR) are listed for ICI treatments of respective cancer types <sup>1,2,3,4,5,6,7,8,9</sup> (see References). **c.** Kaplan-Meier curves for OS stratified per spatial phenotype in various cancer types (Cohort E, p-value shows two-sided log-rank test). **d.** Boxplots displaying median with 25th-75th percentile and range (outliers are displayed as dots) for average expression of gene-sets for the excluded as well as inflamed phenotype in responding and non-responding melanoma patients following ICI treatment (left, Hugo Cohort, n=28 SKCM of which n=5 CR, n=10 PR and n=13 PD; right, Riaz Cohort, n=105 SKCM of which n=23 PRCR, n=34 SD and n=48 PD). Significant differences are: \*\*, p<0.01; \*, p<0.05; NS, p>0.5 (Tukey trend test). Abbreviations: PAAD: pancreatic adenocarcinoma; BRCA: breast carcinoma; PRAD: prostate adenocarcinoma; BLCA: bladder urothelial carcinoma; HNSC: head and neck squamous cell carcinoma; COAD: colon adenocarcinoma; LUAD: lung adenocarcinoma; CESC: cervical squamous cell carcinoma and endocervical adenocarcinoma; KICH: chromophobe renal cell carcinoma; SKCM: skin cutaneous melanoma. Source data are provided within source data file.

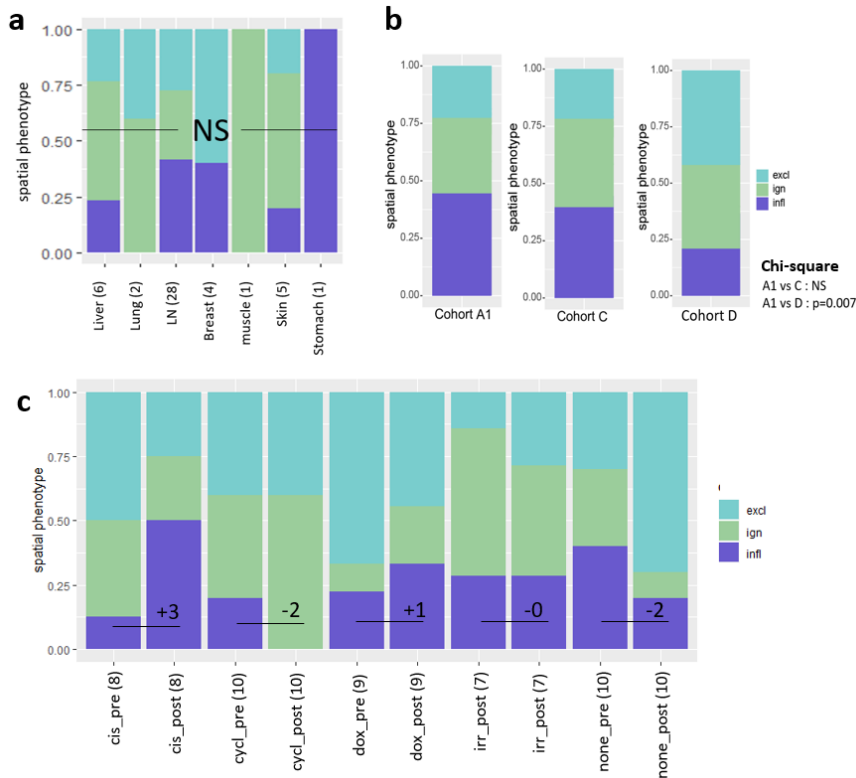

**Supplementary Fig. 5. Spatial phenotypes in metastasized TNBC according to distant sites and induction treatment.** **a.** Stacked bar graphs show frequencies of spatial phenotypes assigned via gene classifier in different metastatic lesions (number indicates total number of lesions, n=47). **b.** Frequencies of spatial phenotypes in Cohort A1 (CD8 stainings, primary tumors, n=101), Cohort C (gene-classifier, primary tumors, n=66) and Cohort D (gene-classifier, metastatic lesions, n=51). **c.** Paired frequencies of spatial phenotypes pre- and post-induction treatments (number indicates a change to inflamed phenotype, n=44 paired mTNBC). Significant differences are: \*\*\*, p<0.001; \*\*, p<0.01; \*, p<0.05; NS, p>0.05 (Chi-square test). Abbreviations: cis: cisplatin; cycl: cyclophosphamide; dox: doxorubicin; irr: irradiation; none: no induction.

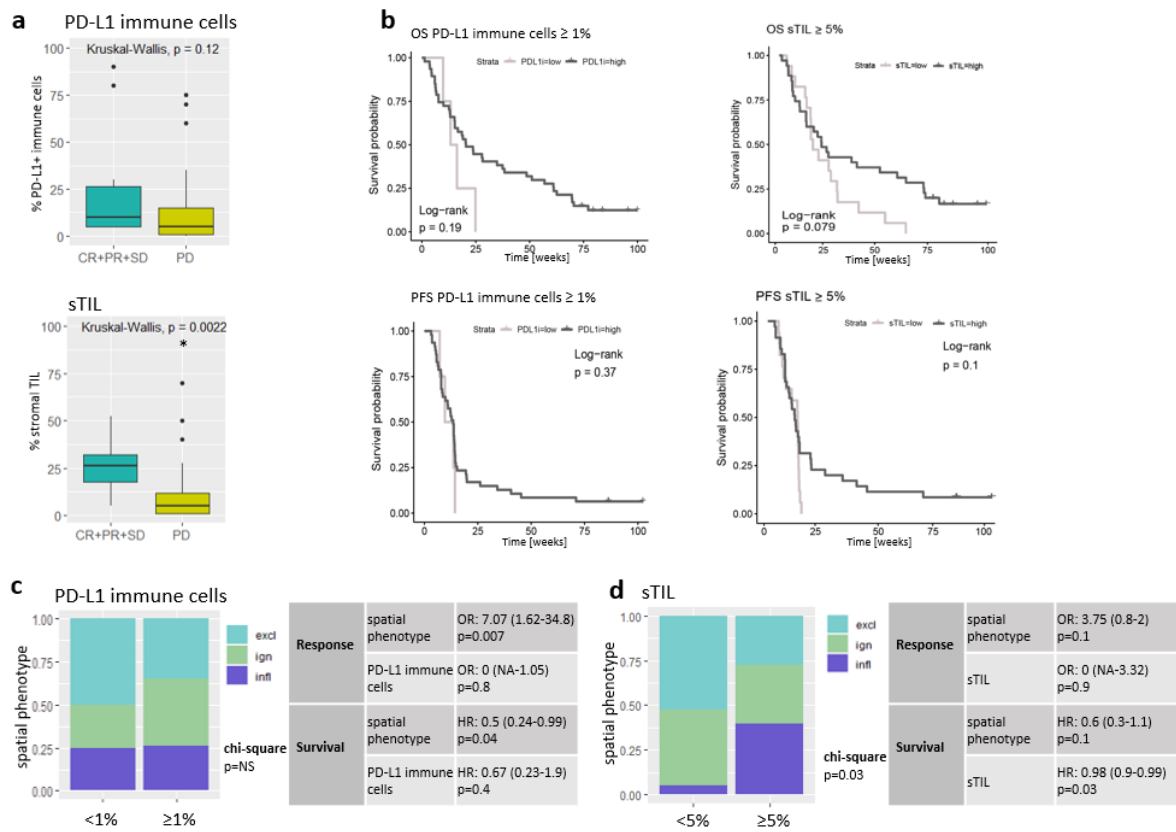

**Supplementary Fig. 6. Standardly used predictive markers of ICI response in patients with metastatic TNBC.** **a.** Boxplots show median with 25th-75th percentile and range (outliers are displayed as dots) for fraction of PDL1-positive immune cells (upper plot) and fraction of stromal TIL (sTIL) per response group (all Cohort D, n=50 mTNBC, of which n=10 CR+PR+SD and n=40 PD; p-value shown for Kruskal-Wallis, one-sided). **b.** Kaplan-Meier curves for OS and PFS with different cutoffs ( $\geq 1\%$ , left) for PDL1 and sTIL ( $\geq 5\%$ ) (p-values shown for log-rank test). **c.** Stacked bar graphs show frequencies of spatial phenotypes stratified by immune cell PD-L1  $\geq 1\%$  (p-value shown for chi-square test); table shows spatial phenotypes and immune cell PD-L1 in multivariable models according to prognostic value (hazard ratio (HR), 95% confidence interval (CI) between brackets and p-value) as well as predictive value (odds ratio (OR), 95% CI and p-value, n=49 mTNBC of which n=10 CR+PR+SD and n=39 PD). **d.** Stacked bar graphs show frequencies of spatial phenotypes stratified by sTIL  $\geq 5\%$  (p-value shown for chi-square test); table shows spatial phenotypes and sTIL in multivariable models according to prognostic value (HR, CI and p-value) as well as predictive value (OR, CI and p value, n=49 mTNBC of which n=10 CR+PR+SD and n=39 PD).



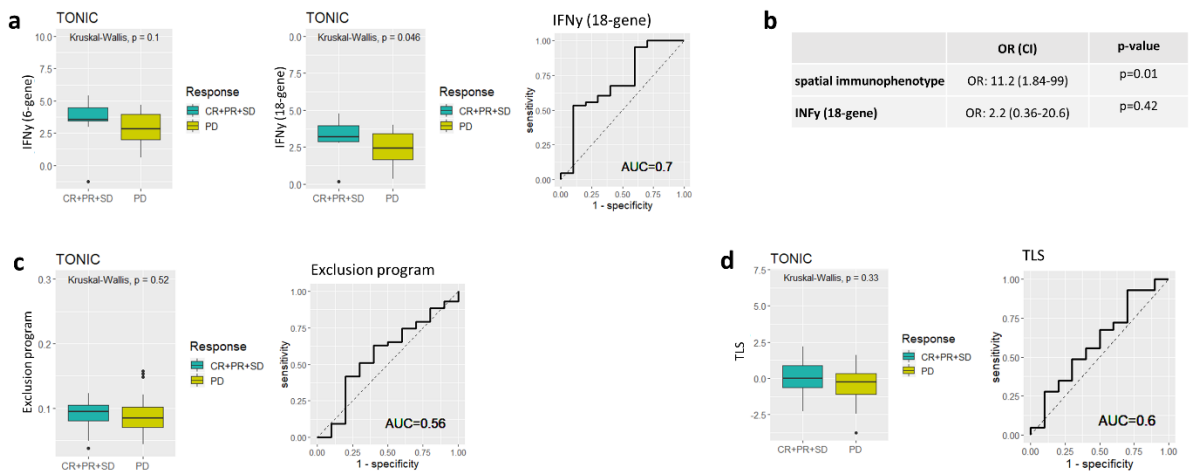

**Supplementary Fig. 7. Predictive value of spatial immunophenotype gene classifier versus public classifiers.** **a.** Box-plots display median with 25th-75th percentile and range (outliers are displayed as dots) for signature scores in responder (CR+PR+SD) and non-responder patients (PD) from TONIC trial according to a short (6-gene) and extended (18-gene) interferon gamma signature from ref<sup>10</sup>. ROC displays area under the curve for predicting anti-PD1 response (CR+PR+SD) using the extended signature. **b.** Multivariable analysis including spatial immunophenotype gene-classifier and the extended IFNy signature. **c.** Box plots and ROC according to a T cell exclusion program signature from ref<sup>11</sup>. **d.** Box plots and ROC according to a tertiary lymphoid structure signature from ref<sup>12</sup>. Cohort D was used for panel **a-d** (n=53 mTNBC of which n=10 CR+PR+SD and n=43 PD). Statistical significance was assessed using Kruskal-Wallis, one-sided. Source data are provided within source data file.

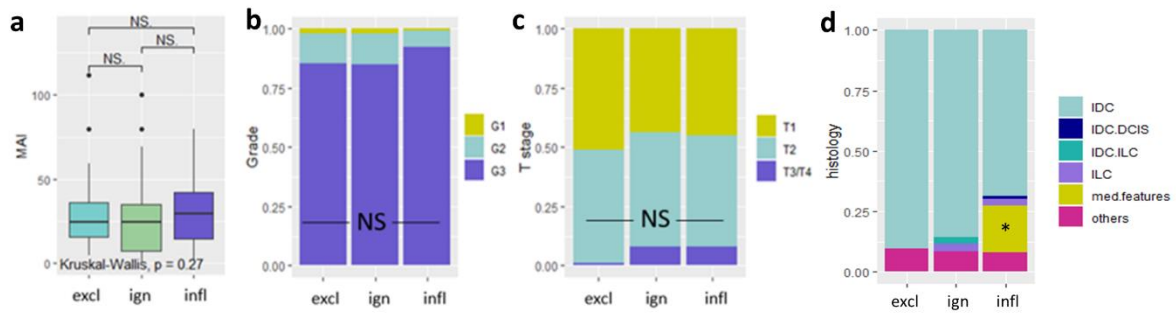

**Supplementary Fig. 8. Clinicopathological features of spatial phenotypes.** **a.** Bpxplots display median with 25th-75th percentile and range (outliers are displayed as dots) for mitotic activity index (MAI). **b.** Tumor grade. **c.** Tumor stage. **d.** Histological subtypes. Significant differences are indicated: \*,  $p < 0.5$ , NS,  $p > 0.5$  (Chi-square). Cohort A was used for panels **a-d**,  $n = 120$  LNN TNBC of which  $n = 37$  excluded,  $n = 27$  ignored and  $n = 56$  inflamed. Source data are provided within source data file. Abbreviations: DCIS: ductal carcinoma in situ; IDC: invasive ductal carcinoma; ILC: invasive lobular carcinoma; med. features: medullary features.

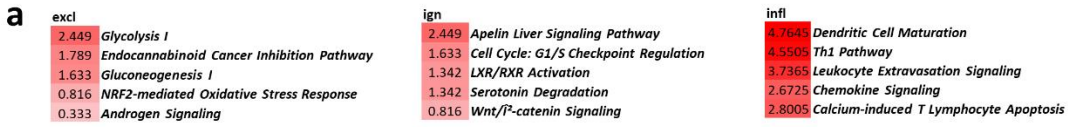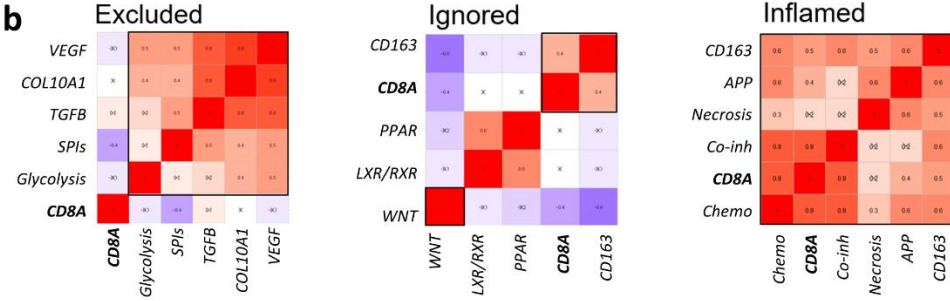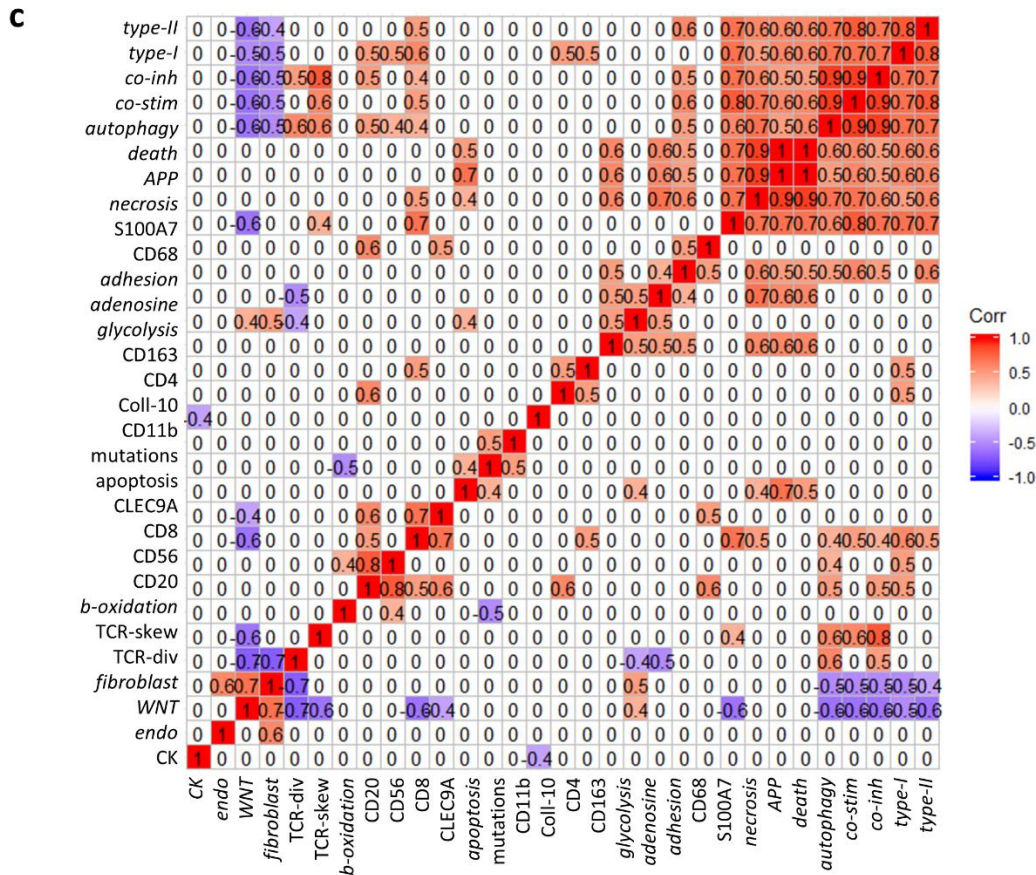

**Supplementary Fig. 9. Immune determinants of spatial phenotypes and their inter-relationships in TNBC.**  
**a.** TOP differentially up-regulated canonical pathways per spatial phenotype (IPA, based on DE analyses, cohort A, n=144 LNN TNBC). **b.** Correlation matrices of pathways in relation to CD8+ T-cells per spatial phenotype (Pearson-correlation; red: positive correlation; blue: negative correlation; crossed R-value: insignificant correlation, Cohort A, n=101). **c.** Integrated correlation matrix of pathway and immune contexts of matched samples (n=30, cohort A; red: significant positive correlation blue: significant negative correlation; white = no correlation). Abbreviations: SPI: serine protease inhibitor gene-set; CK; cytokeratin; endo: endothelial cell barrier gene-set; WNT: WNT-signaling gene-set; fibro: fibroblast barrier gene-set; TCR-div: TCR repertoire diversity; TCR-skew: TCR repertoire clonality (gini-simpson index); b-oxidation: beta-oxidation gene-set; CD20: CD20+ B cells/mm<sup>2</sup>; CD8: CD8+ T cells/mm<sup>2</sup>; CLEC9A: CLEC9A+ DC/mm<sup>2</sup>; apoptosis: apoptosis gene-set; mutations: total number of expressed mutations; CD11b: CD11b+ cells/mm<sup>2</sup>, COL10A1: collagen-10 area, CD4: CD4+ T cells/mm<sup>2</sup>; Cd163: CD163+ cells/mm<sup>2</sup>; glycolysis: glycolysis gene-set; ado: adenosine signalling gene-set; adhesion: cell adhesion signalling gene-set; CD68: CD68+ cells/mm<sup>2</sup>, S100A7: S100A7+ cells/mm<sup>2</sup>, AP: antigen-processing and presentation gene-set, autophagy: autophagy gene-set; costim: T cell co-stimulation gene-set;

chemo: T cell chemokine gene-set; coinh: T cell co-inhibition gene-set; type-I: type-I interferon gene-set; type-II: type-II interferon gene-set.

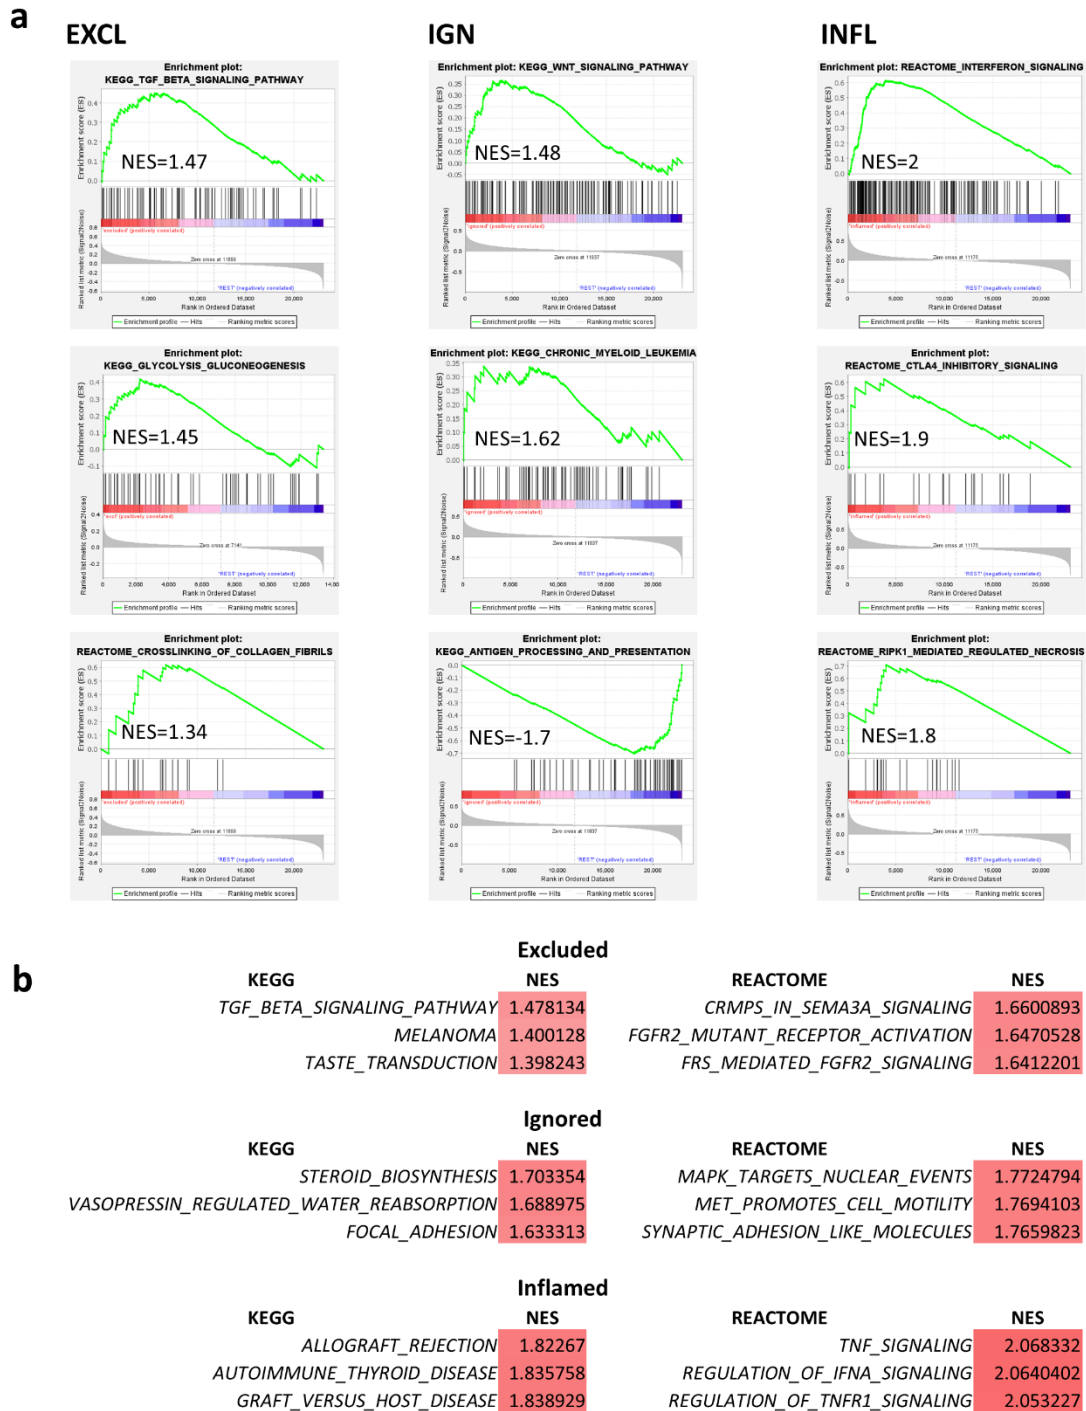

**Supplementary Fig. 10. Gene-set enrichment analysis for spatial immunophenotypes in TNBC. a.** Enrichment plots from KEGG and REACTOME databases showing those gene-sets and pathways that are specifically enriched in the excluded (left panel, n=14), ignored (middle panel, n=13) and inflamed (right panel, n=16) phenotypes in LNN TNBC (Cohort A), and which have also been identified using DE and IPA analysis (see Fig. 4). **b.** Top 3 enriched pathways according to KEGG and REACTOME databases with normalized enrichment scores (NES) per spatial immunophenotype.

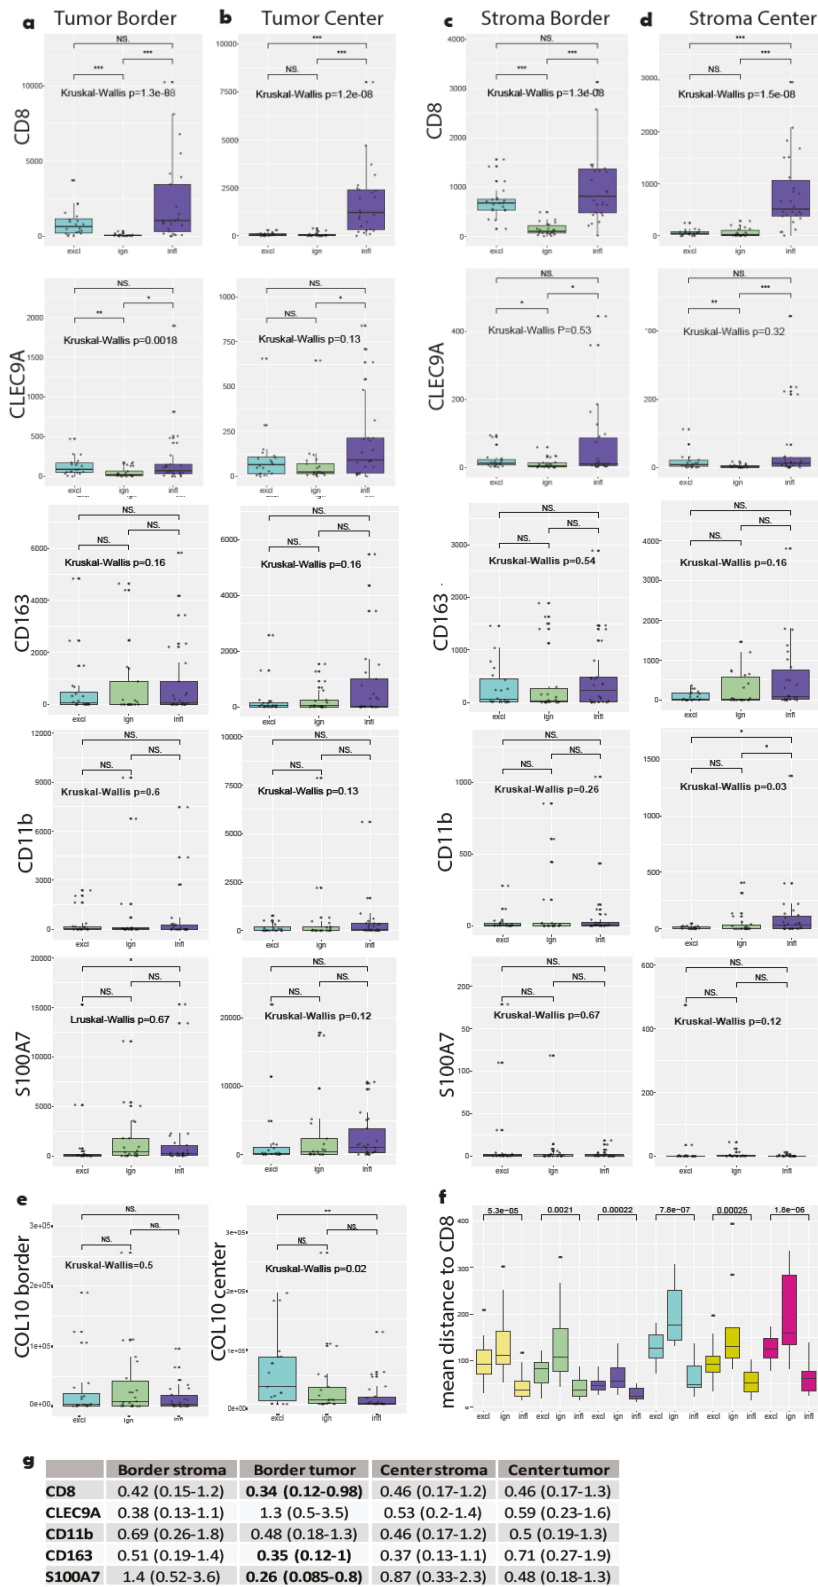

**Supplementary Fig. 11. Immune determinants according to spatial phenotypes in TNBC.** Boxplots show median with 25th-75th percentile and range (outliers are displayed as dots) for cell densities (cell number/mm<sup>2</sup>) following staining and analysis using spatial phenotype panel. **a.** Tumor border. **b.** Tumor center. **c.** Stroma border. **d.** Stroma Center. **e.** boxplots show median with 25th-75th percentile and range (outliers are displayed as dots) for collagen-10 area per phenotype. **f.** Boxplots show mean distances between CD8+ T-cells and other cell types. **g.** Table with Hazard Ratios (HR) and 95% confidence intervals (CI, between brackets) for MFS of immune cell densities (significant HR values are shown in bold, analyses not corrected for multiple testing). Cohort A was used for panels **a-g**, n=68 LNN TNBC of which n=20 excluded, n=22 ignored and n=26 inflamed). Significant differences

are: \*\*\*,  $p < 0.001$ ; \*\*,  $p < 0.01$ ; \*,  $p < 0.05$ , NS,  $p > 0.5$  (Kruskal-Wallis, one-sided). Source data are provided within source data file.

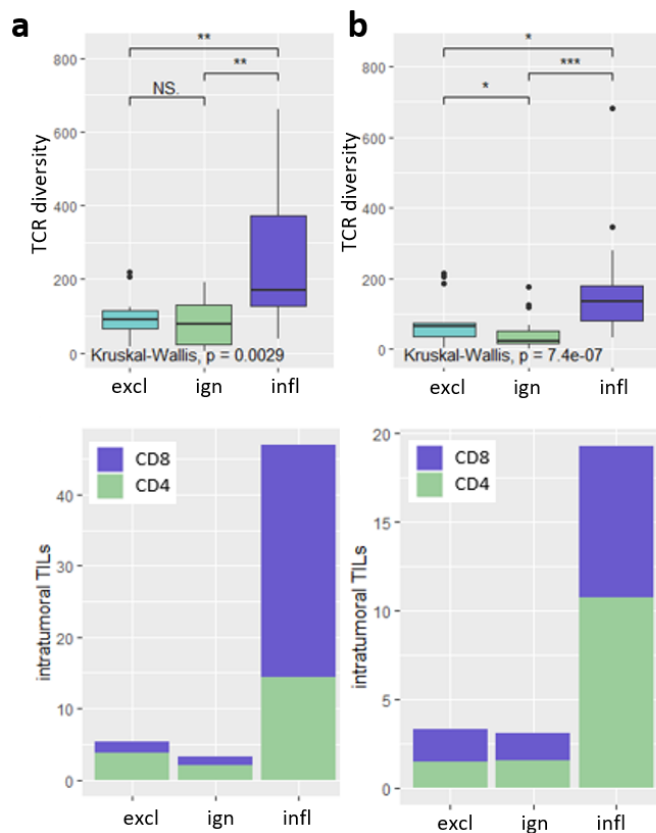

**Supplementary Fig. 12. Spatial phenotypes according to CD8 staining and gene classifier are non-different with respect to TCR repertoire and presence of TILs. a and b.** Boxplots display median with 25th-75th percentile and range (outliers are displayed as dots) for diversity of TCR-V $\beta$  read counts (top) and intra-tumoral T-cells (cells/mm<sup>2</sup>, bottom) of spatial phenotypes that were either based on CD8+ T-cell stainings (**a**, Cohort A2: n=43 TNBC of which n=14 excluded, n=13 ignored and n=16 inflamed) or gene classifier (**b**, Cohort C: n=66 TNBC of which n=13 excluded, n=29 ignored and n=24 inflamed). Source data are provided within source data file.

## References

1. Henriksen, A., Dyhl-Polk, A., Chen, I. & Nielsen, D. Checkpoint inhibitors in pancreatic cancer. *Cancer Treat. Rev.* **78**, 17–30 (2019).
2. Kwa, M. J. & Adams, S. Checkpoint inhibitors in triple-negative breast cancer (TNBC): Where to go from here. *Cancer* **124**, 2086–2103 (2018).
3. Fay, A. P. & Antonarakis, E. S. Blocking the PD-1/PD-L1 axis in advanced prostate cancer: Are we moving in the right direction? *J. Threat. Taxa* **7**, 2–5 (2019).
4. Oliva, M. *et al.* Immune biomarkers of response to immune-checkpoint inhibitors in head and neck squamous cell carcinoma. *Ann. Oncol.* **30**, 57–67 (2019).
5. Kamatham, S., Shahjehan, F. & Kasi, P. M. Immune Checkpoint Inhibitors in Metastatic Colorectal Cancer: Current Status, Recent Advances, and Future Directions. *Curr. Colorectal Cancer Rep.* **15**, 112–121 (2019).
6. Kim, H. S. & Seo, H. K. Immune checkpoint inhibitors for urothelial carcinoma. *Investig. Clin. Urol.* **59**, 285–296 (2018).
7. Regzedmaa, O., Zhang, H., Liu, H. & Chen, J. Immune checkpoint inhibitors for small cell lung cancer: Opportunities and challenges. *Onco. Targets. Ther.* **12**, 4605–4620 (2019).
8. Liu, Y. *et al.* PD-1/PD-L1 inhibitors in cervical cancer. *Front. Pharmacol.* **10**, 1–8 (2019).
9. Flynn, J. P., O'Hara, M. H. & Gandhi, S. J. Preclinical rationale for combining radiation therapy and immunotherapy beyond checkpoint inhibitors (i.e., CART). *Transl. Lung Cancer Res.* **6**, 159–168 (2007).
10. Ayers, M. *et al.* IFN- $\gamma$  – related mRNA profile predicts clinical response to PD-1 blockade. *J. Clin. Invest.* **127**, 1–11 (2017).
11. Jerby-Aron, L. *et al.* A Cancer Cell Program Promotes T Cell Exclusion and Resistance to Checkpoint Blockade. *Cell* **175**, 984–997.e24 (2018).
12. Cabrita, R. *et al.* Tertiary lymphoid structures improve immunotherapy and survival in melanoma. *Nature* **577**, (2020).
