# Supplementary material for: Spatial immunophenotypes predict response to anti-PD1 treatment and capture distinct paths of T cell evasion in triple negative breast cancer
Source: PubMed Central journal article supplement (PMC8476574; doi:10.1038/s41467-021-25962-0), 2021-09-27
Supplement: 41467_2021_25962_MOESM7_ESM.pdf [file 41467_2021_25962_MOESM7_ESM.pdf]

**Title: Supplementary Data 1.**

**Description:** Classifier genes with Affymetrix ID, HGNC Gene Symbol, ENTREZ ID and expression rank in excluded, ignored and inflamed triple-negative breast cancer.

**Title: Supplementary Data 2.**

**Description:** General information regarding data of Cohort A; individual GSM accession codes and coded sample annotation that allow for integrative analyses of clinical-, imaging- and omics data; extended clinical data; extended pathological and IHC scores including T cell density, necrosis and tertiary lymphoid structures (TLS); omics analyses including MIXCR and CIBERSORT outputs; imaging of individual immune markers (manually scored as percentage of all cells) as well as multispectral imaging data regarding immune effector cells and markers related to T cell evasion derived through VECTRA/inform analysis (numbers of cells per mm<sup>2</sup> and collagen-10 as area).

**Title: Supplementary Data 3.**

**Description:** Immunophenotypes based on IHC and classifier gene expressions (raw counts and gene lengths) of cohort F which includes lymph node metastases and matched primary triple negative breast cancer.
